# Supplementary material for: Multimodal gray matter morphological alterations in cognitive subtypes of adolescent major depressive disorder
Source: Research Square preprint supplement (doi:10.21203/rs.3.rs-8778572/v1), 2026-02-18
Supplement: Supplementary file 1 [file d736a43451736a53e26ce9f0.docx]

**1.One Diet and Physical Activity Habits Questionnaire**

**Basic Information**

Name: _____ Gender: _____ Date of Birth: _______

Contact Information: ________ Occupation: _____

Education Level: _____ Years of Education: _____

Height: _____ Weight: _____ BMI: ______

Preferred Hand: Right Hand / Left Hand

**Present illness history**________________________

**Medication history**

| Drug Name | Dose | Starting Time of Administration | Duration of Administration | Is Administration Regular |
| --- | --- | --- | --- | --- |
|  |  |  |  |  |
|  |  |  |  |  |
|  |  |  |  |  |

**2.Hamilton Scale**

**HAMD**

| 1.Depression | Does not exist - 0  Only expressed when asked - 1  Expressed spontaneously in words - 2  Can express this emotion through facial expressions, body postures, voice or tears without using words - 3  The patient's spontaneous and non-spontaneous language (facial expressions, actions) almost completely manifest this emotion - 4 |
| --- | --- |
| 2.sense of guilt | Nonexistent - 0  Blaming oneself and feeling that one has caused harm to others - 1  Believing that one has committed a crime or repeatedly reflecting on past mistakes and errors - 2  Believing that the current illness is a punishment for one's own mistakes, or having sinful delusions - 3  Sinful delusions accompanied by accusing or threatening hallucinations - 4 |
| 3.suicide | Does not exist - 0  Feels that life has no meaning - 1  Wishes to be dead or often thinks about death-related matters - 2  Negative thoughts (suicidal thoughts) - 3  Has serious suicidal behavior - 4 |
| 4.difficulty falling asleep | No difficulty - 0  The main complaint is sometimes having difficulty falling asleep, that is, still unable to fall asleep half an hour after going to bed - 1  The main complaint is having difficulty falling asleep every night - 2 |
| 5.Poor sleep quality (intermediate-level insomnia) | No difficulties - 0  Sleep is light with many nightmares - 1  Woke up in the middle of the night (before 12 o'clock at night) (excluding going to the bathroom) - 2 |
| 6.Early awakening (with insomnia at the end) | No difficulty - 0  Has early awakening, waking up 1 hour earlier than usual, but can fall asleep again - 1  Unable to fall asleep again after early awakening - 2 |
| 7.Work and interests | No difficulties - 0  Expresses only after being asked - 1  Spontaneously and directly or indirectly expresses a loss of interest in activities, work or study, such as feeling listless, indecisive, unable to persist or needing to force oneself to work or engage in activities - 2 |
| 8.sluggish | Normal thinking and speech - 0  Mild retardation was found during the mental examination - 1  Significant retardation was found during the mental examination - 2  Difficulties in conducting the mental examination - 3  Unable to answer questions completely (catatonia) - 4 |
| 9.loud and strong | No - 0  Showing some nervousness during the examination - 1  Significant nervousness or excessive fidgeting - 2  Unable to sit still and stood up during the examination - 3  Rubbing hands, biting fingers, pulling hair, biting lips - 4 |
| 10.Psychological anxiety | No - 0  When asked, they would recount - 1  Spontaneously express - 2  Clear signs of worry shown through facial expressions and speech - 3  Clearly frightened - 4 |
| 11.somatic anxiety | No - 0  Mild - 1  Moderate (with definite above symptoms) - 2  Severe (the above symptoms are severe and affect daily life or require additional treatment) - 3  Disabling (seriously affecting daily life and activities) - 4 |
| 12.gastrointestinal symptom | No - 0  Loss of appetite, but able to eat on one's own without needing encouragement from others - 1  Requires urging, asking for help, or the use of laxatives or digestive aids to eat - 2 |
| 13.Generalized physical symptoms | No - 0  Feeling of heaviness in limbs, back or neck, back pain, headache, muscle pain, general weakness or fatigue - 1  The above symptoms are obvious - 2 |
| 14.Sexual symptoms (such as loss of sexual desire, menstrual disorders) | Asymptomatic - 0  Mild - 1  Severe - 2  Uncertain, or this item is not suitable for the evaluated person (not included in the total score) - 0. |
| 15.hypochondria | Absence - 0  Excessive concern about the body - 1  Repeated consideration of health issues - 2  Hypochondriac delusion - 3  Delusion of hypochondria with hallucinations - 4 |
| 16.lose weight | Weight not reduced - 0  Perhaps there is weight loss related to the current condition - 1  Actually, there is weight loss - 2 |
| 17.insight | Admitting to depression and being ill, or not being depressed now - 0  Admitting to having a disease, but attributing it to poor diet, environmental issues, overwork, viral infection or the need for rest, etc. - 1  Completely denying having a disease - 2 |
| 18.Diurnal variation type | No —— 0  Mild —— 1  Severe —— 2 |
| 19.Dissociation of reality and dissociation of personality | Nonexistent - 0  Expressed only upon questioning - -1  Spontaneously expressed - -2  Having nihilistic delusion - 3  Nihilistic delusion accompanied by hallucinations - 4 |
| 20.Paranoid-like symptoms | No - 0  With suspicion - 1  With relationship concepts - 2  With relationship delusions or paranoid delusions - 3  With hallucinations in relationship delusions or paranoid delusions - 4 |
| 21.obsessive-compulsive disorder (ocd) | Does not exist - 0  Tells when asked - 1  Spontaneously tells - 2 |
| 22.Loss of ability | No —— 0  Only when asked will subjective experiences be elicited — 1  The patient actively expresses a sense of reduced ability — 2  It is necessary to encourage, guide and comfort in order to complete daily affairs in the ward or personal hygiene — 3  Putting on clothes, washing, eating, making the bed or personal hygiene all require assistance from others — 4 |
| 23.feeling of despair | None - 0  Sometimes doubt "whether the situation will improve", but can accept after explanation - 1  Persistently feel "there is no hope", but can accept after explanation - 2  Feel discouraged, pessimistic and desperate about the future, and cannot be excluded after explanation - 3  Automatically and repeatedly state "my illness will not get better" or similar situations - 4 |
| 24.inferiority feeling | No - 0  Only when asked did the patient express feeling of inferiority (I am inferior to others) - 1  The patient spontaneously expressed feeling of inferiority (I am inferior to others) - 2  The patient voluntarily stated: "I am nothing" or "I am inferior", which is only a degree difference from those rated as 2 - 3  The feeling of inferiority reaches the level of delusion, such as "I am a loser" - 4 |

| Project | Total Score of Titles | Points |
| --- | --- | --- |
| A.Anxiety/Somatic Symptoms | 10+11+12+15+17 |  |
| B.Weight | 16 |  |
| C.Cognitive Impairment | 2+3+9+19+20+21 |  |
| D.Day-Night Rhythm Changes | 18 |  |
| E.Delay | 1+7+8+14 |  |
| F.Sleep Disorders | 4+5+6 |  |
| G.Despair | 22+23+24 |  |
| H.Total Score | 1-24 |  |

**HAMA**

Please mark the boxes corresponding to the physical and mental symptoms you experienced in the past one week:：

| number | project |  | No | Light | Medium | Heavy | Extremely Heavy |
| --- | --- | --- | --- | --- | --- | --- | --- |
| 1 | anxious mood | Worrying, being anxious, feeling that the worst is about to happen, and being easily irritated. | 0 | 1 | 2 | 3 | 4 |
| 2 | tension | Tension, fatigue easily, inability to relax, emotional reactions, crying easily, trembling, feeling uneasy. | 0 | 1 | 2 | 3 | 4 |
| 3 | fear | Afraid of darkness, strangers, being alone, animals, taking a vehicle or traveling, and crowded places. | 0 | 1 | 2 | 3 | 4 |
| 4 | insomnia | Difficulty in falling asleep, easy awakening, poor sleep quality, frequent dreams, night terrors, and feeling tired after waking up. | 0 | 1 | 2 | 3 | 4 |
| 5 | cognitive function | Or it can be called memory or attention disorder, with difficulty in concentrating and poor memory. | 0 | 1 | 2 | 3 | 4 |
| 6 | depressive mood | Loss of interest, lack of pleasure in past hobbies, depression, early awakening, more daytime sleepiness and less nighttime sleep. | 0 | 1 | 2 | 3 | 4 |
| 7 | Physiological anxiety (muscle system) | Muscle soreness, limited mobility, muscle twitching, limb twitching, teeth trembling, voice trembling. | 0 | 1 | 2 | 3 | 4 |
| 8 | Somatic anxiety (sensory system) | Blurred vision, chills and fever, weakness and fatigue, and a tingling sensation all over the body. | 0 | 1 | 2 | 3 | 4 |
| 9 | Cardiovascular system symptoms | Tachycardia, palpitations, chest pain, vascular throbbing sensation, fainting sensation, atrial fibrillation. | 0 | 1 | 2 | 3 | 4 |
| 10 | Respiratory system symptoms | Chest tightness, suffocation sensation, sighing, difficulty in breathing. | 0 | 1 | 2 | 3 | 4 |
| 11 | gastrointestinal symptom | Difficulty in swallowing, belching, indigestion (abdominal pain, bloating, nausea, feeling of fullness in the stomach after eating), intestinal motility, intestinal rumbling, diarrhea, weight loss, constipation. | 0 | 1 | 2 | 3 | 4 |
| 12 | Reproductive and urinary system symptoms | Frequent urge to urinate, urgency in urination, amenorrhea, sexual apathy, premature ejaculation, impotence. | 0 | 1 | 2 | 3 | 4 |
| 13 | Symptoms of the autonomic nervous system | Dry mouth, flushed face, pale complexion, excessive sweating, goosebumps, tension headache, hair standing on end. | 0 | 1 | 2 | 3 | 4 |
| 14 | Behavior during the meeting | General manifestations: Nervousness, inability to relax, unease, biting fingers, clenching fists, touching handkerchiefs, facial muscle twitching, foot restlessness, hand tremors, frowning, stiff expression, high muscle tension, sigh-like breathing, pale complexion.  Physiological manifestations: Swallowing, belching, fast heart rate at rest, rapid breathing (more than 20 breaths per minute), hyperactive tendon reflexes, tremors, dilated pupils, eyelid twitching, excessive sweating, protruding eyes. | 0 | 1 | 2 | 3 | 4 |

| Project | Total Score of Titles | Points |
| --- | --- | --- |
| A.Overall Score | 1-14 |  |
| B.Physical Anxiety | 7+8+9+10+11+12+13 |  |
| C.Psychogenic Anxiety | 1+2+3+4+5+6+14 |  |

**3.STOP BANG**

口No 口Yes 1.Snoring: Do you snore loudly (so loudly that it can be heard even when there's a closed door between you and the person listening)?

口No 口Yes 2.Fatigue: Do you feel tired, exhausted or want to sleep during the day?

口No 口Yes 3.Observation: Has anyone observed any instance of breathing cessation when you were sleeping?

口No 口Yes 4.Blood pressure: Have you ever been or currently be a patient with hypertension?

口No 口Yes 5.BMI: > 35 kilograms per square meter?

口No 口Yes6.Age: ≥ 50 years old?

口No 口Yes7.Neck Circumference: ≥ 40 centimeters?

口No 口Yes 8.Gender: Male?

Criteria for assessment: Those who answered "yes" to 3 or more items are classified as high-risk individuals for OSAS, while those who answered "yes" to less than 3 items are considered to be at low risk.

Is it more than 3 items?　　　口No 口Yes

| Part A | 1 | 2 | 3 | 4 | 5 |  |
| --- | --- | --- | --- | --- | --- | --- |
| Drum |  |  |  |  |  | Drum |
| Curtain |  |  |  |  |  | Curtain |
| Bell |  |  |  |  |  | Bell |
| Tea |  |  |  |  |  | Tea |
| School |  |  |  |  |  | School |
| Parent |  |  |  |  |  | Parent |
| Moon |  |  |  |  |  | Moon |
| Garden |  |  |  |  |  | Garden |
| Hat |  |  |  |  |  | Hat |
| Farmer |  |  |  |  |  | Farmer |
| Ear |  |  |  |  |  | Ear |
| Swan |  |  |  |  |  | Swan |
| Color |  |  |  |  |  | Color |
| House |  |  |  |  |  | House |
| River |  |  |  |  |  | River |

**4.1.California Verbal Learning Test（CAVLT）**

| result | 1 | 2 | 3 | 4 | 5 |
| --- | --- | --- | --- | --- | --- |
| Correct |  |  |  |  |  |
| replication |  |  |  |  |  |
| Insertion |  |  |  |  |  |

| Part B | 6 |
| --- | --- |
| Table |  |
| Cavalry |  |
| Bird |  |
| Shoe |  |
| Stove |  |
| Mountain |  |
| Glasses |  |
| Towel |  |
| White cloud |  |
| Ship |  |
| Sheep |  |
| Pistol |  |
| Pencil |  |
| Church |  |
| Fish |  |

| Part A | 7 |
| --- | --- |
| Drum |  |
| Curtain |  |
| Bell |  |
| Tea |  |
| School |  |
| Parent |  |
| Moon |  |
| Garden |  |
| Hat |  |
| Farmer |  |
| Ear |  |
| Swan |  |
| Color |  |
| House |  |
| River |  |

| result | 6 | 7 |
| --- | --- | --- |
| Correct |  |  |
| replication |  |  |
| Insertion |  |  |

30 minutes later.....

| Part B | 8 Delayed recall of words |  | 9 Delayed (30-minute) oral recognition test | | | |
| --- | --- | --- | --- | --- | --- | --- |
| Drum |  |  | Buffer |  |  |  |
| Curtain |  |  | A Bell | PA Stomach | SA  Teacher | A Parent |
| Bell |  |  | SA Sun | PA Bridal Attire | B Cavalry | B Towel |
| Tea |  |  | A Tea | B Fireplace | A Garden | SB Socks |
| School |  |  | SA Nose | B Cloud | PB Bed | B Pistol |
| Parent |  |  | B Church | A Drum | B Glasses | SA Window |
| Moon |  |  | A Hat | PA Leader | PA Cat | B Table |
| Garden |  |  | SB Pen | A Swan | A House | PB Wine Jar |
| Hat |  |  | A School | B Mountain | SA Apartment | SA Sea |
| Farmer |  |  | PA Court | A Moon | A Farmer | A Color |
| Ear |  |  | B Shoes | SA Rainbow | PA Mussels | PA Dragon Gate |
| Swan |  |  | SA Coffee | A Ear | B Boat | B Fish |
| Color |  |  | B Bird | B Sheep | A River |  |
| House |  |  | A Curtain | B Pencil | PB Skirt |  |
| River |  |  |  |  |  |  |

| result | 8 |
| --- | --- |
| Correct |  |
| replication |  |
| Insertion |  |

| result | 9 |
| --- | --- |
| List A Number of errors（A is not） |  |
| List A Number of voice intrusions（PA stands for） |  |
| List A Semantic intrusion count（SA stands for） |  |
| List B Intrusion count（B stands for） |  |
| List B Number of voice intrusions（PB stands for） |  |
| List B Semantic intrusion count（SB stands for） |  |

**4.2.Stroop Color Word Test（SCWT）**

**Card A Correct Answer:**

Green Blue Yellow Red

Yellow Red Green Blue

Blue Green Yellow Red

Blue Yellow Red Green

Red Green Blue Yellow

Yellow Green Blue Red

**Card B Correct Answer:**

Green Blue Yellow Red

Yellow Red Green Blue

Blue Green Yellow Red

Blue Yellow Red Green

Red Green Blue Yellow

Yellow Green Blue Red

**Card C Correct Answer:**

Green Blue Yellow Red

Yellow Red Green Blue

Blue Green Yellow Red

Blue Yellow Red Green

Red Green Blue Yellow

Yellow Green Blue Red

| Project | 1 | 2 | 3 |
| --- | --- | --- | --- |
| Completion time (seconds) |  |  |  |
| Number of errors |  |  |  |
| Total score |  |  |  |

**4.3.Digit Span Test**

forward backward

| 3 □5-8-2 | 2 □2-4 |
| --- | --- |
| □6-9-4 | □5-8 |
| 4 □6-4-3-9 | 3 □6-2-9 |
| □7-2-8-6 | □4-1-5 |
| 5 □4-2-7-3-1 | 4 □3-2-7-9 |
| □7-5-8-3-6 | □4-9-6-8 |
| 6 □6-1-9-4-7-3 | 5 □1-5-2-8-6 |
| □3-9-2-4-8-7 | □6-1-8-4-3 |
| 7 □5-9-7-1-4-2-8 | 6 □5-3-9-4-1-8 |
| □4-1-7-9-3-8-6 | □7-2-4-8-5-6 |
| 8 □5-8-1-9-2-6-4-7- | 7 □8-1-2-9-3-6-5 |
| □3-8-2-9-5-1-7-4 | □4-7-3-9-1-2-8 |
| 9 □2-7-5-8-6-2-5-8-4 | 8 □9-4-3-7-6-2-5-8 |
| □7-1-3-9-4-2-5-6-8 | □7-2-8-1-9-6-5-3 |
| 10 □5-2-7-4-9-1-3-7-4-6 | 9 □6-3-1-9-4-3-6-5-8 |
| □4-7-2-5-9-1-6-2-5-3 | □9-4-1-5-3-8-5-7-2 |
| 11 □4-1-6-3-8-2-4-6-3-5-9 | 10 □6-4-5-2-6-7-9-3-8-6 |
| □3-6-1-4-9-7-5-1-4-2-7 | □5-1-6-2-7-4-3-8-5-9 |
| 12 □7-4-9-6-1-3-5-9-6-8-2-5 |  |
| □6-9-4-7-1-9-7-4-2-5-9-2 |  |

| Scored from the forward |  |
| --- | --- |
| Scored from the backward |  |
| Total |  |

**4.4.Colored Trails Test（CTT）**

**Trail 1**

| Total completion time of all numbers__________ （0-150）second（*If the process is not completed within 150 seconds, record 150.*） | |
| --- | --- |
| Number of errors__________ （0-25） | Number of correct__________ （0-25） |

**Trail 2**

| Total completion time of all numbers__________ （0-300）second（*If the process is not completed within 150 seconds, record 150.*） |
| --- |
| Error in numerical sequence__________ （0-25） |
| The correct number of lines__________ （0-24） |


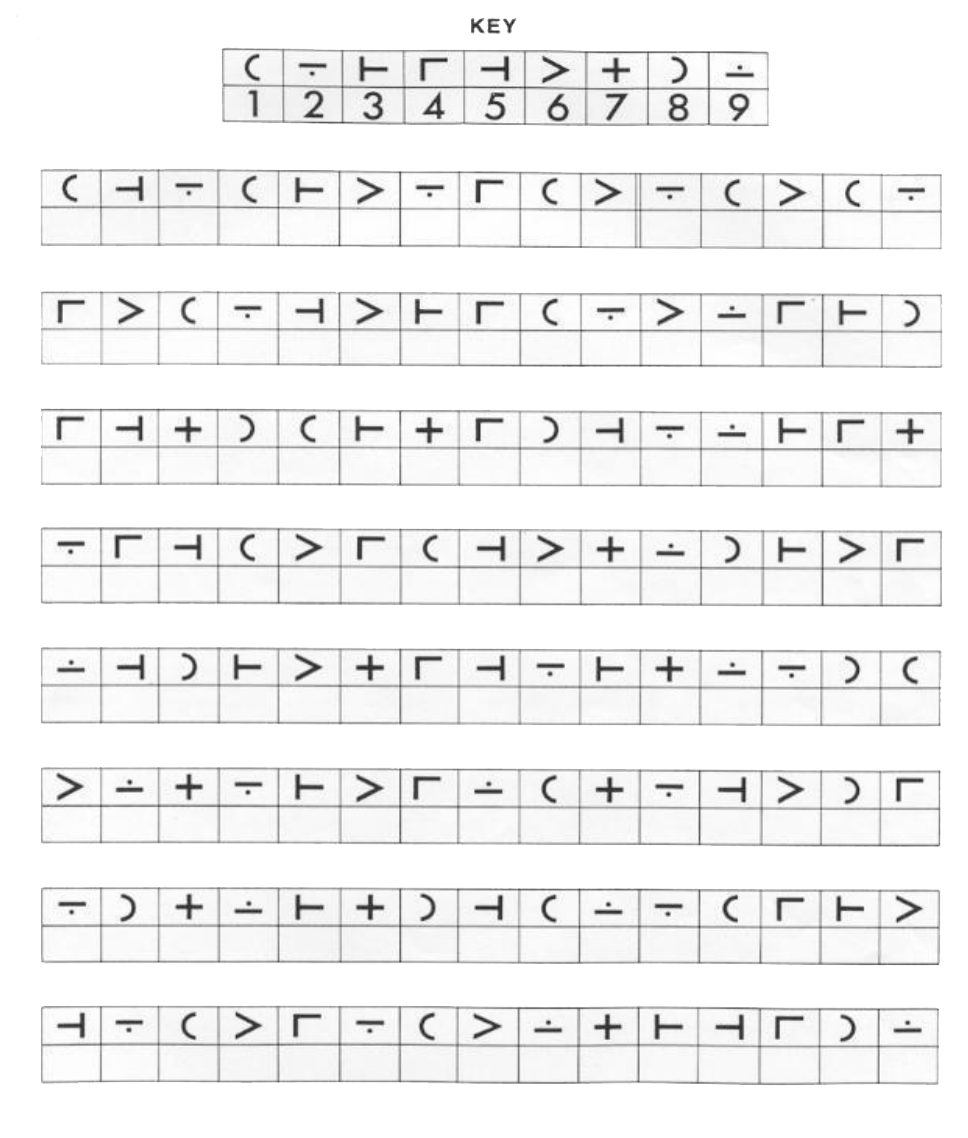


**4.5.Symbol Digit Modalities Test（SDMT）**

Record the correct number of filled-in digits within 90 seconds＿＿＿＿Number of errors＿＿＿＿Number of continue＿＿
